# Supplementary material for: Targeting metastasis-initiating cancer stem cells in gastric cancer with leukaemia inhibitory factor
Source: PubMed Central journal article supplement (PMC10920825; doi:10.1038/s41420-024-01839-1), 2024-03-07

# Supplementary Figure S1

A

## Hippo pathway signature

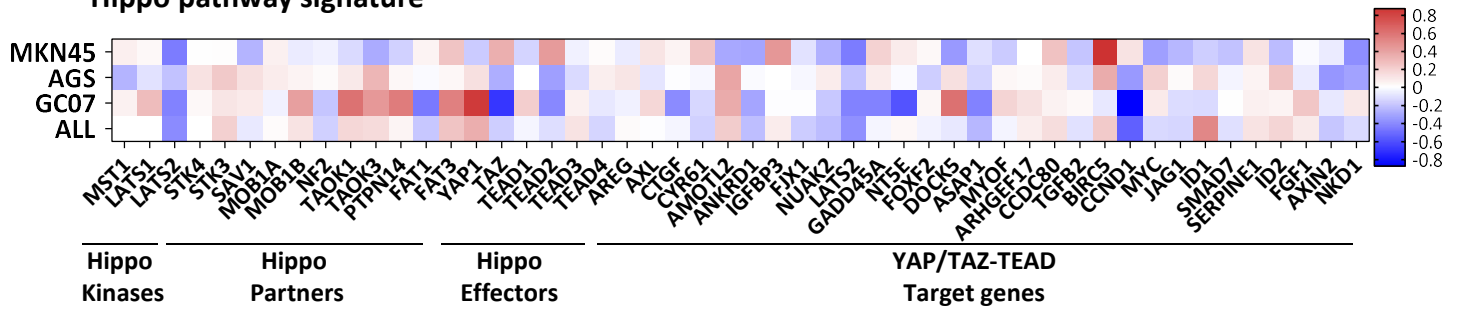

B

## Metastasis-related genes

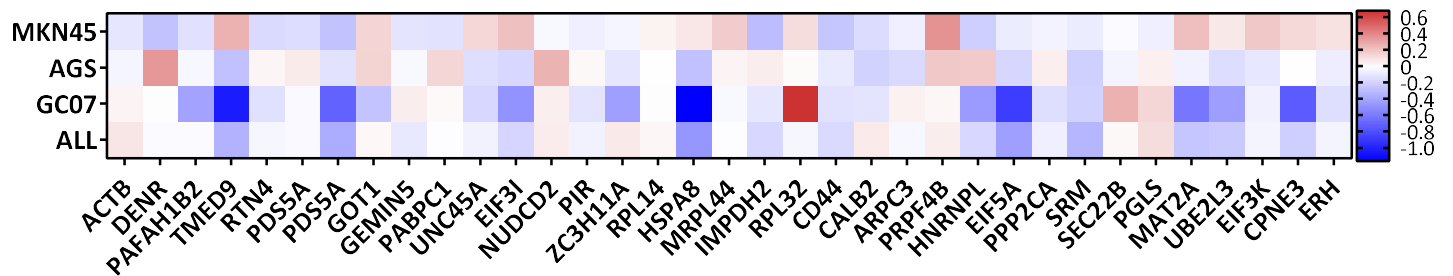

# Supplementary Figure S2

A

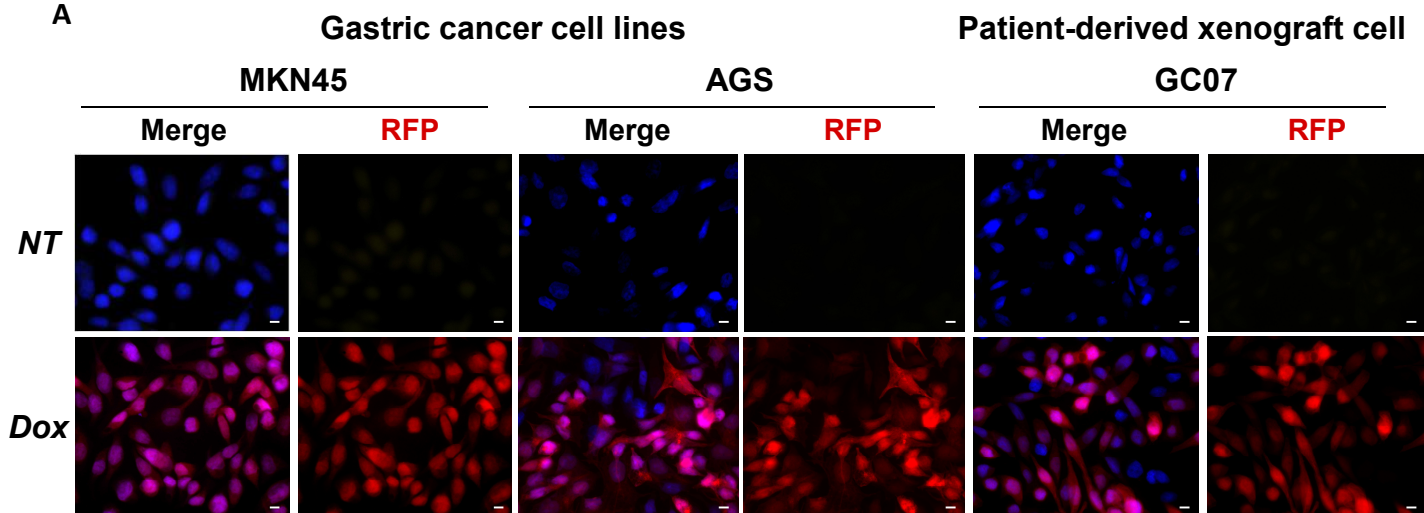

B

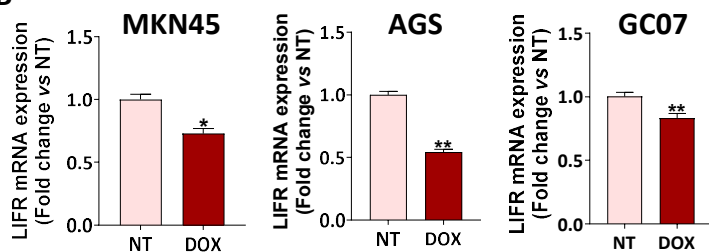

C

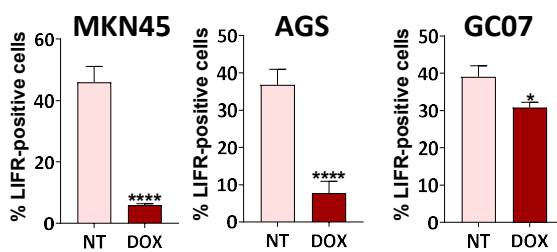

D

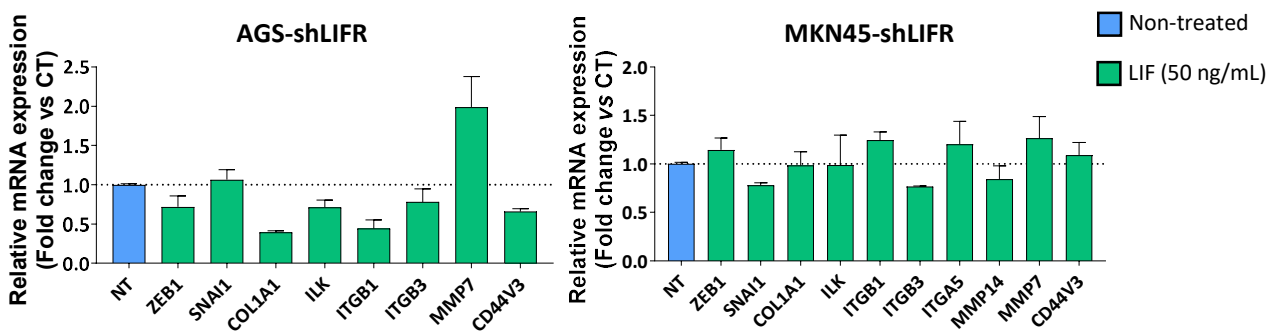

E

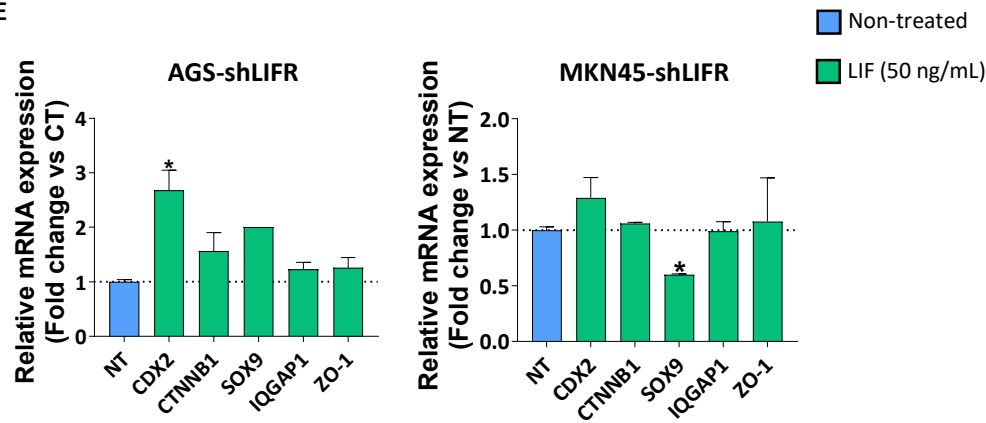

# Supplementary Figure S3

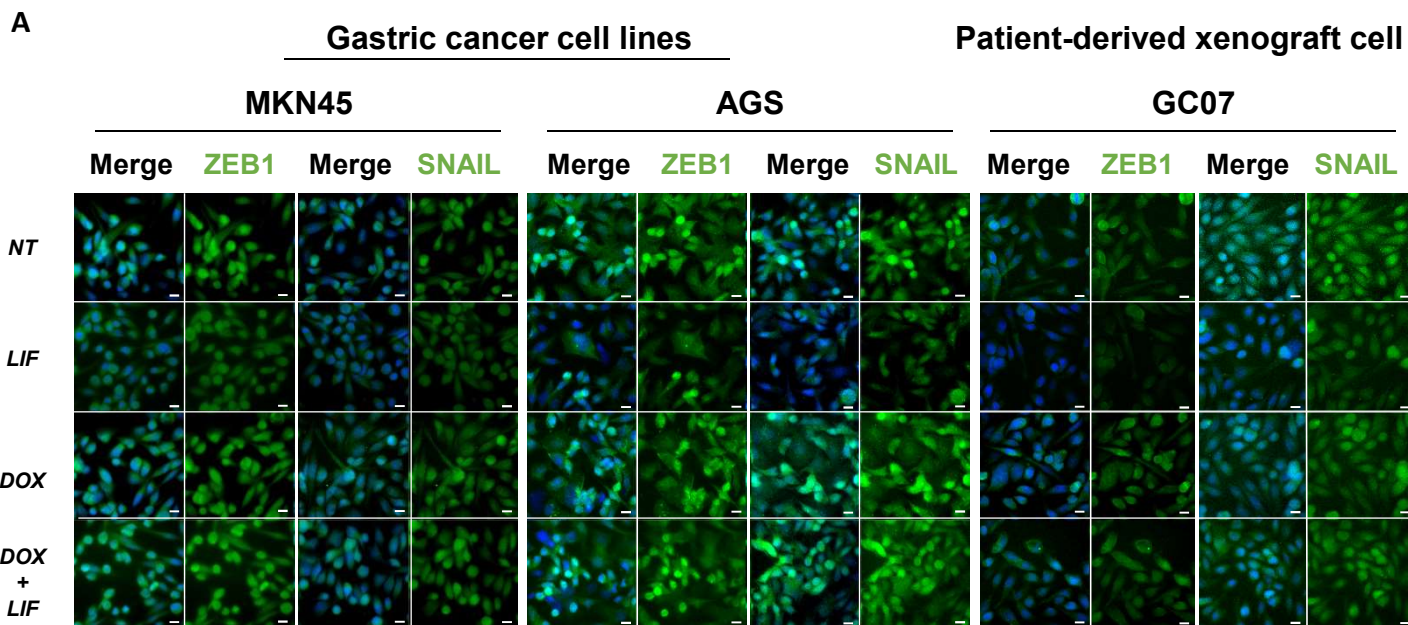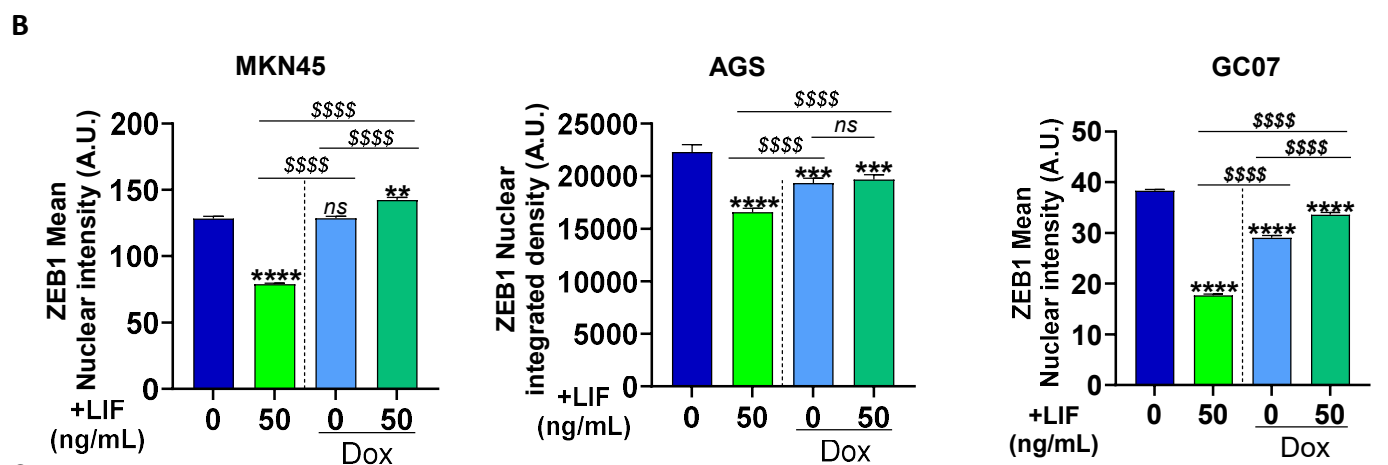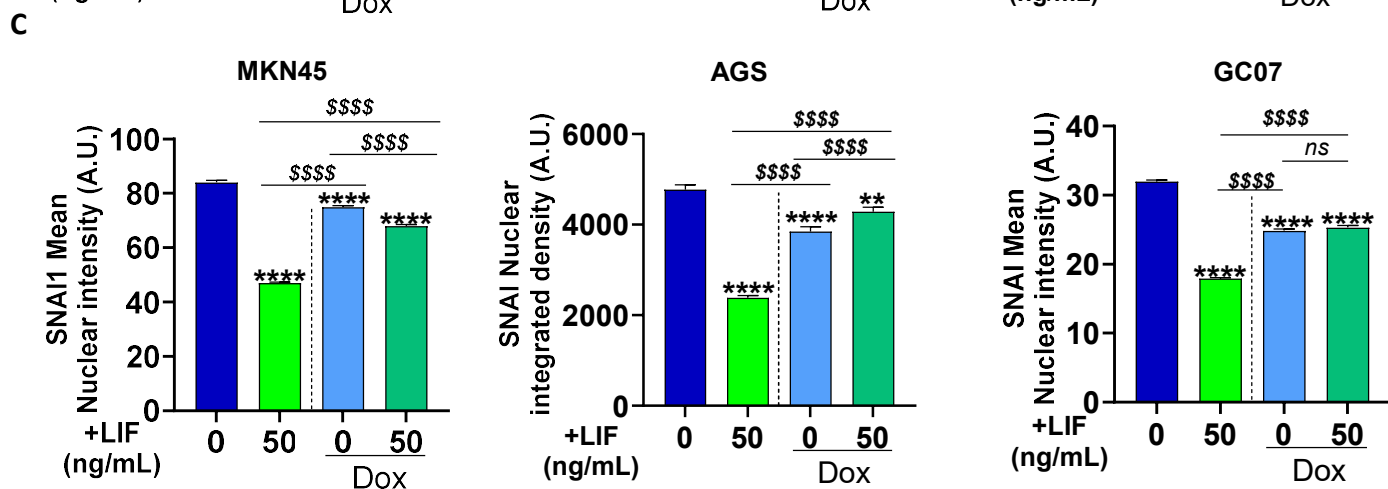

# Supplementary Figure S4

**A**

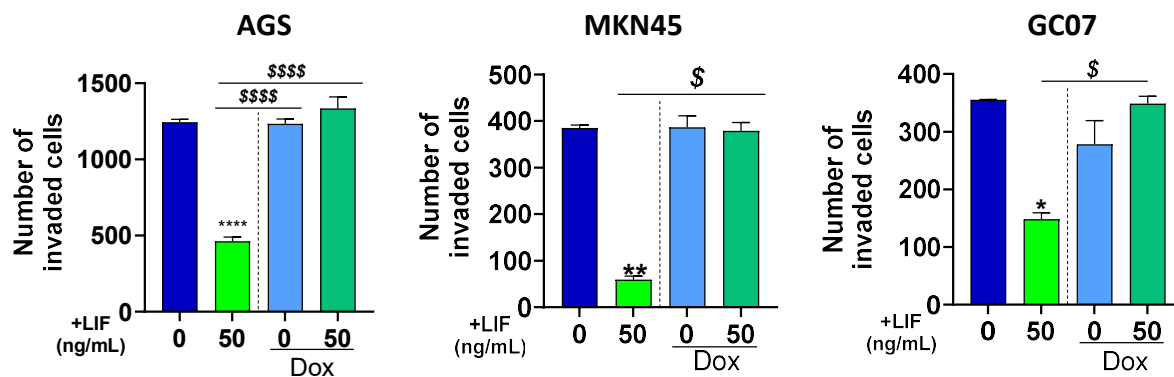

**B**

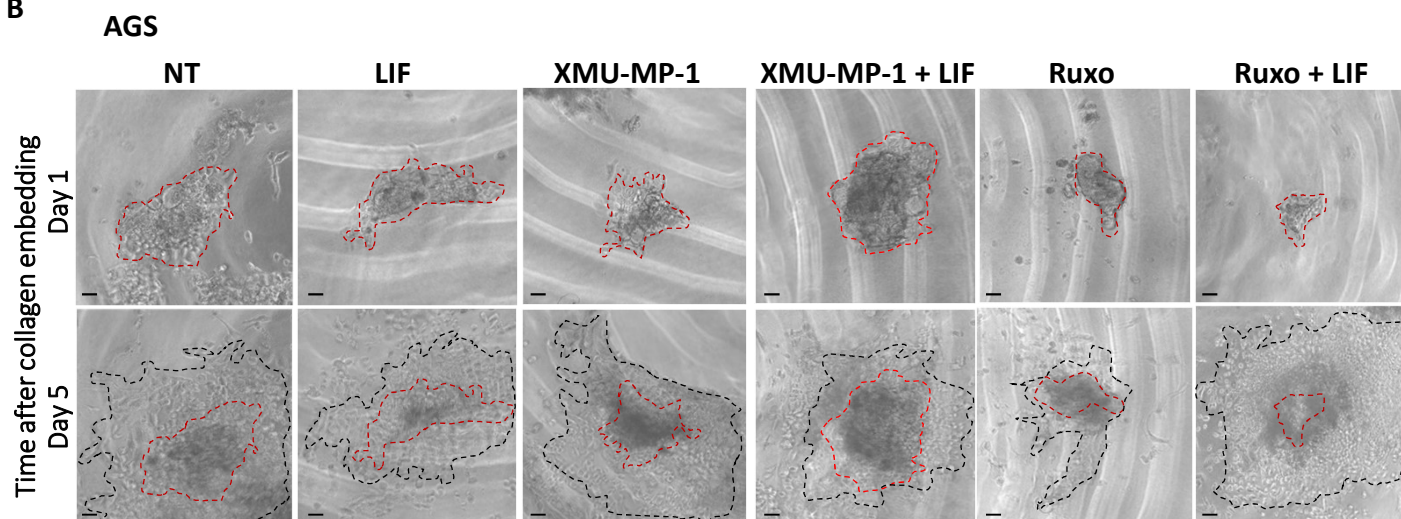

**C**

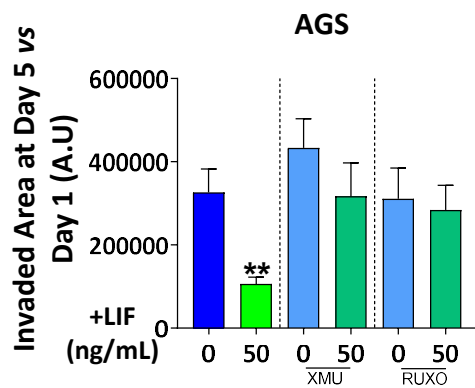

# Supplementary Figure S5

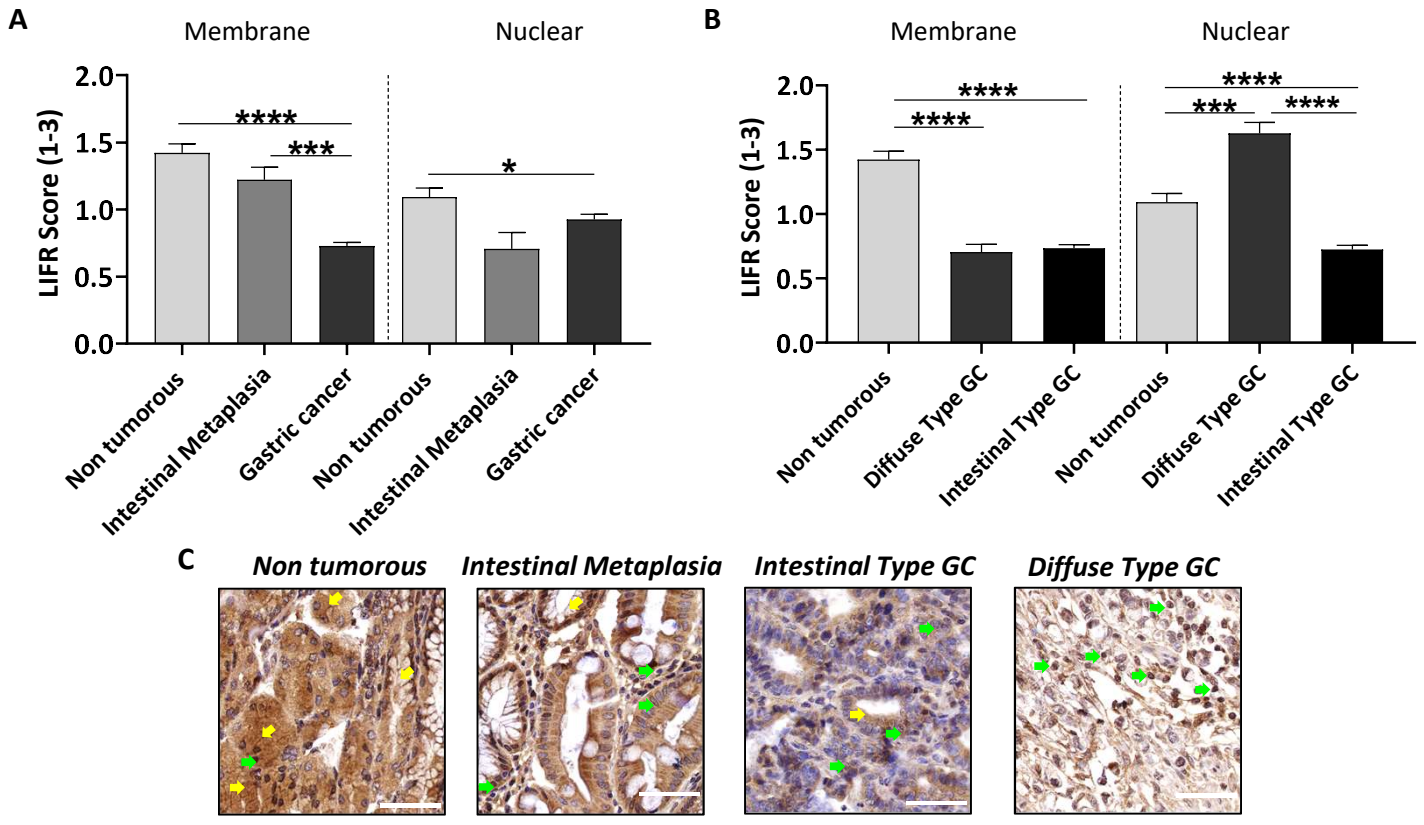

Supplement: 41420_2024_1839_MOESM2_ESM.pdf [file 41420_2024_1839_MOESM2_ESM.pdf]
